# Supplementary material for: Immune-Related Pneumonitis Was Decreased by Addition of Chemotherapy with PD-1/L1 Inhibitors: Systematic Review and Network Meta-Analysis of Randomized Controlled Trials (RCTs)
Source: MDPI journal article supplement (doi:10.3390/curroncol29010025), 2022-01-09
Supplement: s1 [file s1]

# Supplementary Materials: Immune-Related Pneumonitis Was Decreased by Addition of Chemotherapy with PD-1/L1 Inhibitors: Systematic Review and Network Meta-Analysis of Randomized Controlled Trials (RCTs)

**Table S1. Demographic Characteristics of the Patients at Baseline.**

| Characteristic            | Total<br>(n=11466) | I+C group<br>(n=5406) | I group<br>(n=6060) | p-value |
|---------------------------|--------------------|-----------------------|---------------------|---------|
| <b>No. of RCT</b>         | 31 trails          | 15 trails             | 19 trails           | 0.424   |
| <b>Median age</b>         | 64 years           | 63 years              | 65 years            | N. R    |
| <b>Sex</b>                |                    |                       |                     |         |
| Male                      | 6443(56.2%)        | 2384(44.1%)           | 4059(67.0%)         | 0.152   |
| Female                    | 5023(43.8%)        | 3022(55.1%)           | 2001(33.0%)         | 0.122   |
| <b>History</b>            |                    |                       |                     |         |
| NSCLC/SCLC                | 5616(49.0%)        | 2467(45.6%)           | 3149(52.0%)         | 0.748   |
| TNBC                      | 2269(19.8%)        | 1960(36.3%)           | 309(5.1%)           | 0.573   |
| ES, G/GEJ                 | 1112(9.7%)         | 250(4.6%)             | 862(14.2%)          | 0.401   |
| UC                        | 1419(12.4%)        | 453(8.4%)             | 966(15.9%)          | 0.141   |
| Others                    | 1050(9.1%)         | 276(5.1%)             | 774(12.8%)          | 0.775   |
| <b>PD-1/L1 Inhibitors</b> |                    |                       |                     |         |
| PD-1 inhibitors           | 7481(65.2%)        | 2775(51.3%)           | 4706(77.7%)         | 0.263   |
| PD-L1 inhibitors          | 3985(34.8%)        | 2631(48.7%)           | 1354(22.3%)         | 0.840   |

Abbreviation: I+C group, PD-1/L1 inhibitors plus chemotherapy; I group, PD-1/L1 inhibitors; NSCLC: non-small cell lung cancer; SCLC: small cell lung cancer; G/GEJ: Gastric and gastroesophageal junction cancer; TNBC: Triple-negative breast cancer; NSCLC: non-small-cell lung cancer; UC: urothelial cancer; HNSCC: Head and neck squamous cell carcinoma; ES: esophagus.

**Table S2. Value of SUCRA and mean rank in overall population. Higher SUCRA scores correlated with a higher risk of IRP.**

| Treatment group      | Any grade IRP |           | Grade 3-5 IRP |           |
|----------------------|---------------|-----------|---------------|-----------|
|                      | SUCRA         | Mean rank | SUCRA         | Mean rank |
| PD-1/L1+chemotherapy | 50.7          | 2         | 50.5          | 2         |
| PD-1/L1 monotherapy  | 99.3          | 1         | 99.2          | 1         |
| Chemotherapy         | 50.7          | 3         | 0.3           | 3         |

**Notes:** IRP, Immune-related Pneumonitis; ICIs, immune check inhibitors; SUCRA, surface

under the cumulative ranking curve.

**Table S3. Value of SUCRA and mean rank for different ICIs comparison. Higher SUCRA scores correlated with a higher risk of IRP.**

| Treatment group    | Any grade IRP |           | Grade 3-5 IRP |           |
|--------------------|---------------|-----------|---------------|-----------|
|                    | SUCRA         | Mean rank | SUCRA         | Mean rank |
| PD-1 monotherapy   | 97.8          | 1.1       | 92.5          | 1.3       |
| PD-1+chemotherapy  | 52.4          | 2.9       | 65.7          | 2.9       |
| PD-L1 monotherapy  | 52.4          | 2.9       | 52.9          | 2.4       |
| PD-L1+chemotherapy | 47.3          | 3.1       | 34.0          | 3.6       |
| Chemotherapy       | 0.0           | 5.0       | 4.8           | 4.8       |

**Notes:** IRP, Immune-related Pneumonitis; ICIs, immune check inhibitors; SUCRA, surface under the cumulative ranking curve.

**Table S4. The value of SCURA for 3 group and mixed RR that I+C group Versus I group based on cancer type**

| Immune-related<br>Pneumonitis | Any grade IRP |            |            |                      | Grade 3-5 IRP |            |            |                      |
|-------------------------------|---------------|------------|------------|----------------------|---------------|------------|------------|----------------------|
|                               | I+C<br>group  | I<br>group | C<br>group | RR<br>(I+C VS. I)    | I+C<br>group  | I<br>group | C<br>group | RR<br>(I+C VS. I)    |
| <b>Cancer type</b>            |               |            |            |                      |               |            |            |                      |
| NSCLC                         | 51.3          | 98.7       | 0.0        | 0.44<br>(0.19-1.01)  | 49.7          | 98.9       | 1.4        | 0.39<br>(0.15-0.98)  |
| TNBC                          | 58.5          | 82.7       | 8.8        | 0.25<br>(0.00-14.09) | 63.1          | 78.8       | 8.2        | 0.46<br>(0.02-12.13) |
| UC                            | 45.1          | 97.4       | 7.5        | 0.23<br>(0.04-1.33)  | N. R          | N. R       | N. R       | N. R                 |
| G/GEJ/ES                      | 70.6          | 79.1       | 0.1        | 0.91<br>(0.36-2.27)  | N. R          | N. R       | N. R       | N. R                 |

**Notes:** I+C group, PD-1/L1 inhibitors plus chemotherapy; I group, PD-1/L1 inhibitors; NSCLC: non-small cell lung cancer; SCLC: small cell lung cancer; G/GEJ: Gastric and gastroesophageal junction cancer; TNBC: Triple-negative breast cancer; NSCLC: non-small-cell lung cancer; UC: urothelial cancer; HNSCC: Head and neck squamous cell carcinoma; ES, G/GEJ: esophageal cancer and gastric or gastroesophageal cancer.



**Table S5. The value of P for inconsistency model test and IF for loop inconsistency in overall population and subgroup analysis.**

| Outcomes of Interest      | Any grade IRP |         |       |             | Grade 3-5 IRP |         |       |             |
|---------------------------|---------------|---------|-------|-------------|---------------|---------|-------|-------------|
|                           | No. of RCTs   | p-value | Loop  | 95%CI IF    | No. of RCTs   | p-value | Loop  | 95%CI IF    |
| <b>Overall population</b> | 31            | 0.3931  | 0.684 | (0.00-1.42) | 27            | 0.9930  | 0.008 | (0.00-1.84) |
| <b>ICIs</b>               | 31            | 0.3545  | 0.424 | (0.00-1.87) | 27            | 0.9616  | 0.047 | (0.00-1.98) |
| <b>NSCLC</b>              | 17            | N. R    | N. R  | N. R        | 16            | N. R    | N. R  | N. R        |
| <b>TNBC</b>               | 5             | N. R    | N. R  | N. R        | 5             | N. R    | N. R  | N. R        |
| <b>UC</b>                 | 3             | 0.1725  | 1.224 | (0.00-3.15) | 2             | N. R    | N. R  | N. R        |
| <b>ES, GC/GEJ</b>         | 3             | 0.9805  | 0.030 | (0.00-2.65) | 2             | N. R    | N. R  | N. R        |

**Notes:** No.: number; NSCLC: non-small cell lung cancer; SCLC: small cell lung cancer; G/GEJ: Gastric and gastroesophageal junction cancer; TNBC: Triple-negative breast cancer; NSCLC: non–small-cell lung cancer; UC: urothelial cancer; HNSCC: Head and neck squamous cell carcinoma; ES, G/GEJ: esophageal cancer and gastric or gastroesophageal cancer; N.R, not report.

**Table S6. Results of node-splitting analysis for the assessment inconsistencies for the IRP in cancer type.**

| Comparator            | Intervention | Overall | NSCLC | TNBC | UC   | G, G/GEJ |
|-----------------------|--------------|---------|-------|------|------|----------|
| <b>Any grade IRP</b>  |              |         |       |      |      |          |
| C group               | I group      | 0.26    | N. R  | N. R | N. R | N. R     |
| C group               | I+C group    | 0.11    | N. R  | N. R | 0.17 | 0.98     |
| I group               | I+C group    | 0.12    | N. R  | N. R | 0.17 | 0.98     |
| <b>Grade 3 -5 IRP</b> |              |         |       |      |      |          |
| C group               | I group      | 0.99    | N. R  | N. R | N. R | N. R     |
| C group               | I+C group    | 0.99    | N. R  | N. R | N. R | N. R     |
| I group               | I+C group    | 0.99    | N. R  | N. R | N. R | N. R     |

**Notes:** IRP, immune-related pneumonitis; C group, chemotherapy group; I group, PD-1/L1 monotherapy; I+C group, PD-1/L1+chemotherapy. N. R, not report.

**Table S7. Results of node-splitting analysis for the assessment inconsistencies for the IRP in different ICIs group.**

| Comparator                   | Intervention       | <i>p</i> -value of any grade | <i>p</i> -value of grade 3-5 |
|------------------------------|--------------------|------------------------------|------------------------------|
| <b>IRP in different ICIs</b> |                    |                              |                              |
| Chemotherapy                 | PD-1 monotherapy   | 0.043                        | 0.96                         |
| Chemotherapy                 | PD-1+chemotherapy  | 0.064                        | 0.96                         |
| Chemotherapy                 | PD-L1 monotherapy  | 0.447                        | N. R                         |
| Chemotherapy                 | PD-L1+chemotherapy | 0.970                        | N. R                         |
| PD-1 monotherapy             | PD-1+chemotherapy  | 0.025                        | 0.96                         |
| PD-L1 monotherapy            | PD-L1+chemotherapy | 0.644                        | N. R                         |

**Notes:** IRP, immune-related pneumonitis; ICIs, immune check inhibitors; N. R, not report.

**Table S8: Supplementary basic characteristic for eligible RCTs.**

| Study name    | Study ID    | Total, No. |     | Grade 1-5 IRP, No. |     | Grade 3-5 IRP, No. |      |
|---------------|-------------|------------|-----|--------------------|-----|--------------------|------|
|               |             | Exp        | Con | Exp                | Con | Exp                | Con  |
| CASPIAN       | NCT03043872 | 265        | 266 | 7                  | 2   | 2                  | 1    |
| KEYNOTE-062   | NCT02494583 | 250        | 254 | 8                  | 9   | N. R               | N. R |
| IMpassion130  | NCT02425891 | 453        | 437 | 16                 | 1   | 2                  | 0    |
| KEYNOTE-522   | NCT03036488 | 781        | 389 | 10                 | 5   | 3                  | 1    |
| KEYNOTE-024   | NCT02142738 | 154        | 150 | 12                 | 1   | 4                  | 1    |
| KEYNOTE-604   | NCT03066778 | 223        | 223 | 9                  | 5   | 3                  | 0    |
| MYSTIC        | NCT02453282 | 369        | 352 | 8                  | 5   | 5                  | 2    |
| KEYNOTE-407   | NCT02775435 | 278        | 280 | 23                 | 6   | 9                  | 3    |
| KEYNOTE-045   | NCT02256436 | 267        | 245 | 11                 | 1   | 6                  | 0    |
| IMpassion031  | NCT03197935 | 164        | 167 | 2                  | 2   | 1                  | 0    |
| IMpower133    | NCT02763579 | 198        | 196 | 5                  | 5   | N. R               | N. R |
| IMpower110    | NCT02409342 | 286        | 263 | 11                 | 1   | 2                  | 0    |
| KEYNOTE-010   | NCT01905657 | 682        | 309 | 40                 | 6   | 18                 | 2    |
| KEYNOTE-189   | NCT02578680 | 405        | 202 | 20                 | 6   | 12                 | 4    |
| IMvigor130    | NCT02807636 | 453        | 354 | 12                 | 12  | N. R               | N. R |
| IMpower130    | NCT02367781 | 473        | 232 | 31                 | 3   | 0                  | 1    |
| KEYNOTE-042   | NCT02220894 | 636        | 615 | 53                 | 3   | 22                 | 1    |
| KEYNOTE-061   | NCT02370498 | 294        | 276 | 8                  | 0   | 2                  | 0    |
| KEYNOTE-048   | NCT02358031 | 276        | 300 | 15                 | 19  | 5                  | 2    |
| IMpower132    | NCT02657434 | 291        | 274 | 18                 | 6   | 6                  | 3    |
| IMpower131    | NCT02367794 | 334        | 334 | 23                 | 5   | 4                  | 3    |
| KEYNOTE -355  | NCT02819518 | 562        | 281 | 14                 | 0   | 6                  | 0    |
| KEYNOTE-119   | NCT02555657 | 309        | 292 | 6                  | 0   | 3                  | 0    |
| DANUBE        | NCT02516241 | 345        | 313 | 6                  | 1   | 2                  | 0    |
| KEYNOTE-181   | NCT02564263 | 314        | 296 | 15                 | 2   | N. R               | N. R |
| CheckMate 017 | NCT01642004 | 131        | 129 | 6                  | 0   | 1                  | 0    |
| CheckMate 057 | NCT01673867 | 287        | 268 | 8                  | 1   | 3                  | 1    |
| CheckMate 078 | NCT02613507 | 337        | 165 | 15                 | 0   | 4                  | 0    |
| CheckMate 026 | NCT01927419 | 267        | 263 | 14                 | 1   | 6                  | 0    |
| CheckMate 066 | NCT01721772 | 206        | 205 | 3                  | 0   | 0                  | 0    |
| CheckMate 037 | NCT01721746 | 268        | 102 | 5                  | 0   | 0                  | 0    |

**Notes:** Study ID: from ClinicalTrials.gov.; Exp: experimental; Con: control; N.R: not report. No.: the number of patients.

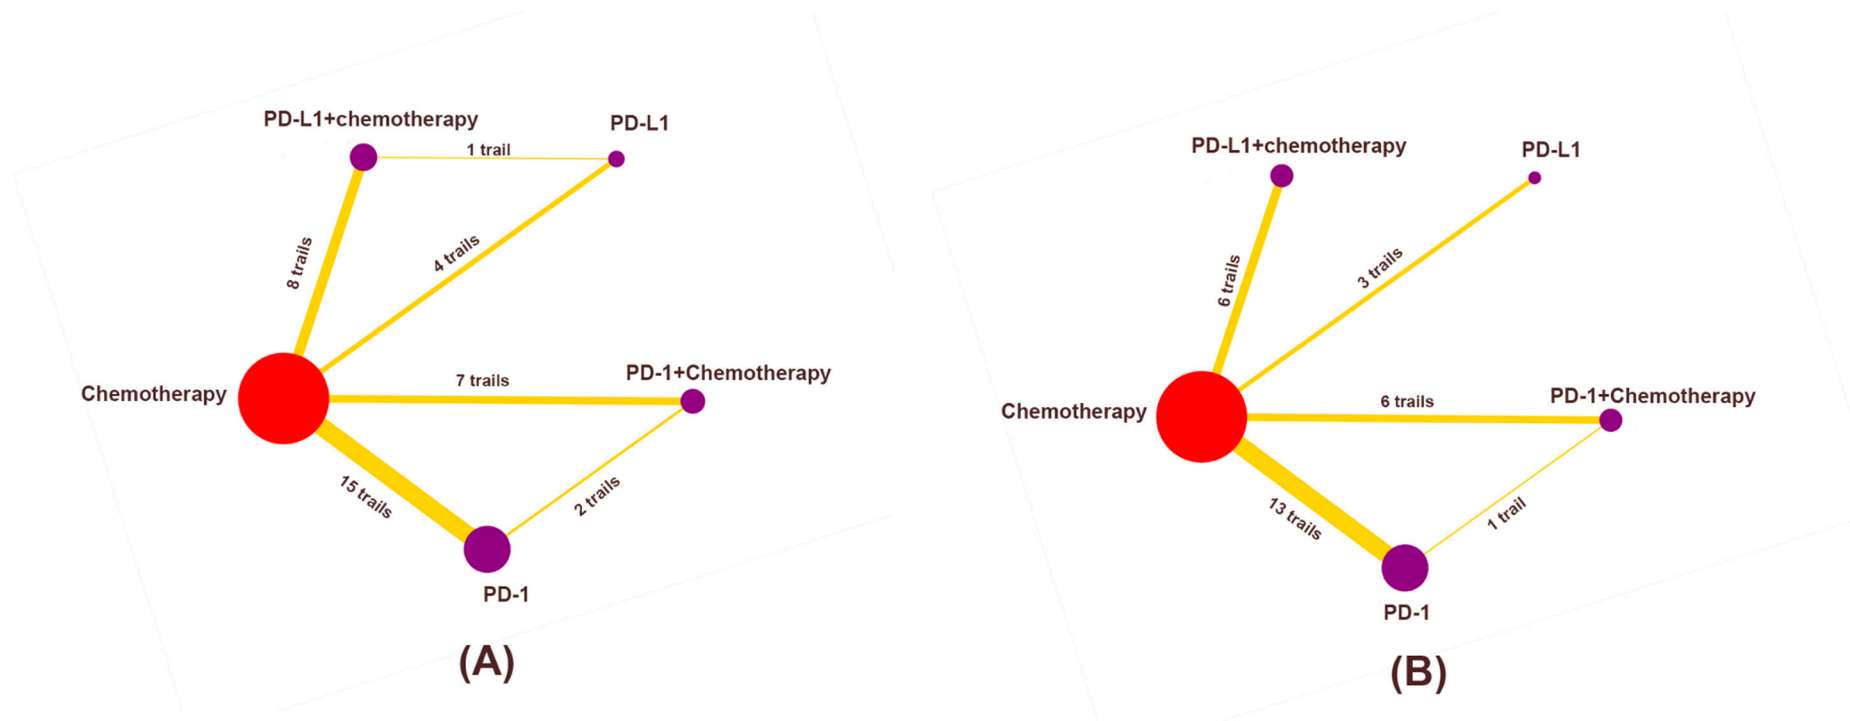

**Figure S1.** Network plots of subgroup analysis based on different ICIs (A) any grade IRP, (B) grade 3-5 IRP

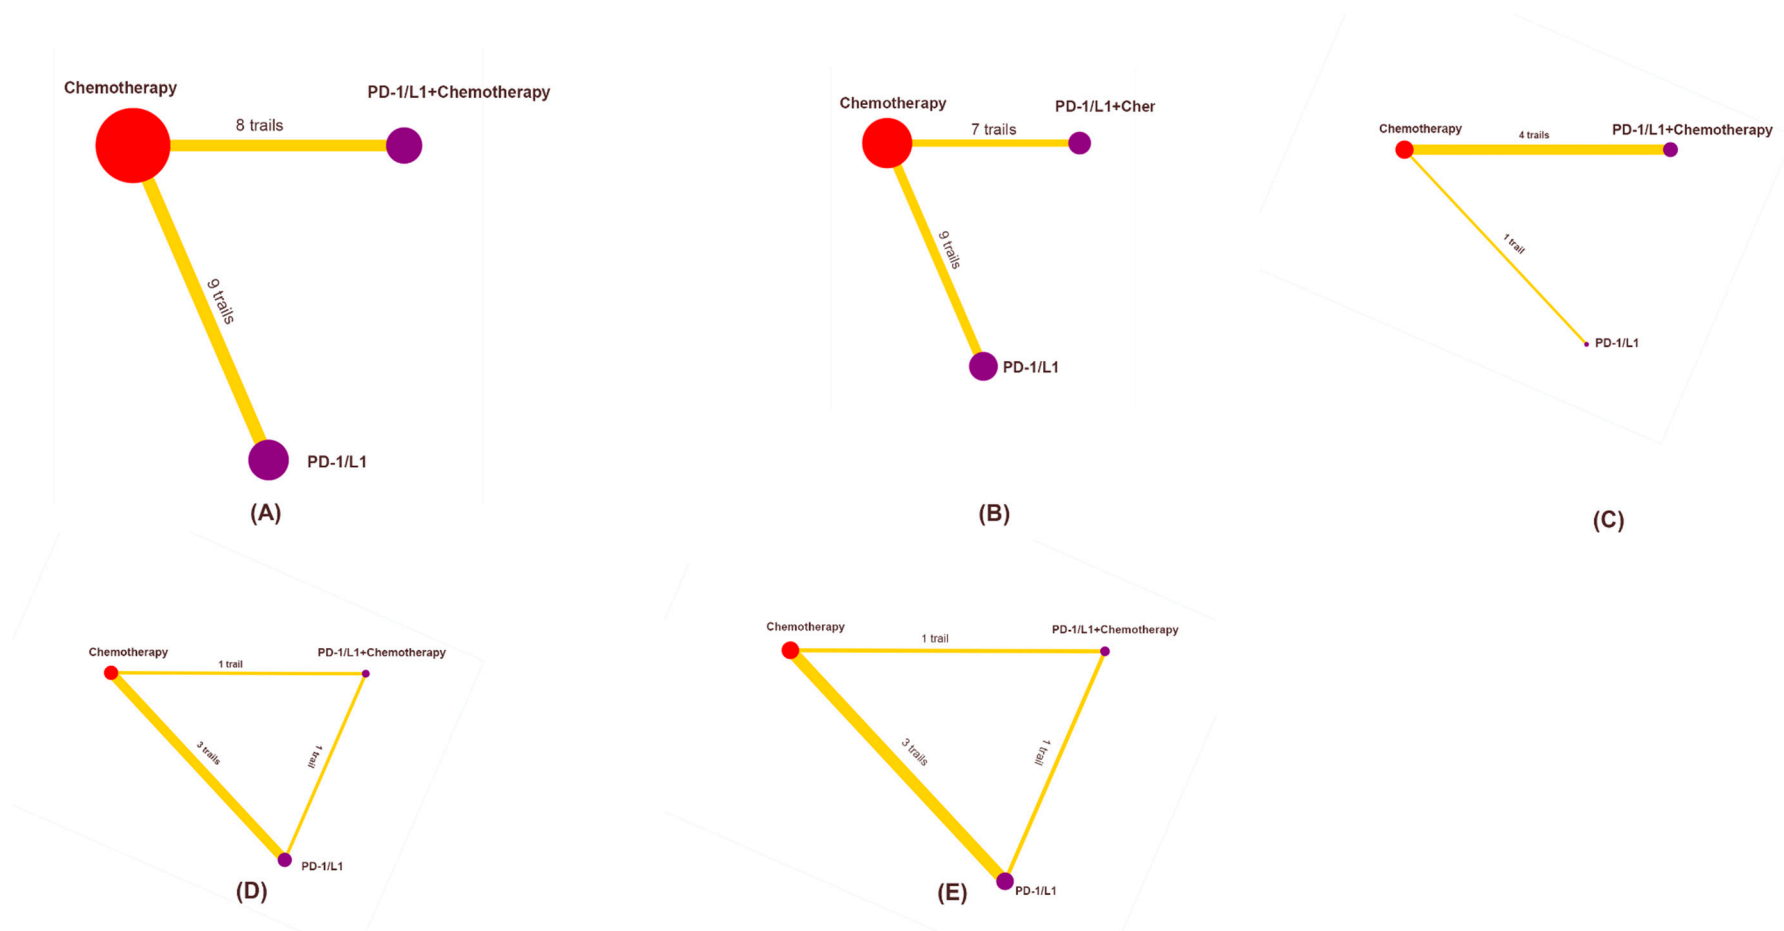

**Figure S2.** Network established for comparisons based on cancer type. (A) any grade IRP and (B) grade 3-5 IRP in NSCLC, (C) any grade IRP and grade 3-5 IRP in TNBC, (D) any grade IRP in UC, (E) any grade IRP in G/GEJ



|               | Random sequence generation (selection bias) | Allocation concealment (selection bias) | Blinding of participants and personnel (performance bias) | Blinding of outcome assessment (detection bias) | Incomplete outcome data (attrition bias) | Selective reporting (reporting bias) | Other bias |
|---------------|---------------------------------------------|-----------------------------------------|-----------------------------------------------------------|-------------------------------------------------|------------------------------------------|--------------------------------------|------------|
| CASPIAN       | +                                           | +                                       | +                                                         | +                                               | +                                        | +                                    | +          |
| Checkmate 017 | ?                                           | ?                                       | -                                                         | +                                               | +                                        | +                                    | +          |
| CheckMate 026 | ?                                           | ?                                       | -                                                         | +                                               | +                                        | +                                    | +          |
| CheckMate 037 | +                                           | +                                       | -                                                         | +                                               | +                                        | +                                    | +          |
| Checkmate 057 | ?                                           | ?                                       | -                                                         | +                                               | +                                        | +                                    | +          |
| CheckMate 066 | ?                                           | ?                                       | +                                                         | +                                               | +                                        | +                                    | +          |
| CheckMate 078 | +                                           | +                                       | -                                                         | +                                               | +                                        | +                                    | +          |
| DANUBE        | +                                           | +                                       | -                                                         | +                                               | +                                        | +                                    | +          |
| IMpassion031  | +                                           | +                                       | +                                                         | +                                               | +                                        | +                                    | +          |
| IMpassion130  | +                                           | +                                       | +                                                         | +                                               | +                                        | +                                    | +          |
| IMpower110    | ?                                           | +                                       | ?                                                         | +                                               | +                                        | +                                    | +          |
| IMpower130    | +                                           | ?                                       | -                                                         | +                                               | +                                        | +                                    | +          |
| IMpower131    | ?                                           | ?                                       | -                                                         | +                                               | +                                        | +                                    | +          |
| IMpower132    | +                                           | +                                       | +                                                         | ?                                               | +                                        | +                                    | +          |
| IMpower133    | ?                                           | +                                       | +                                                         | +                                               | -                                        | +                                    | +          |
| IMvigor130    | +                                           | +                                       | ?                                                         | +                                               | -                                        | +                                    | +          |
| KEYNOTE-010   | +                                           | +                                       | -                                                         | +                                               | +                                        | +                                    | +          |
| KEYNOTE-024   | +                                           | +                                       | ?                                                         | +                                               | +                                        | +                                    | +          |
| KEYNOTE-042   | +                                           | ?                                       | -                                                         | +                                               | +                                        | +                                    | +          |
| KEYNOTE-045   | ?                                           | -                                       | ?                                                         | +                                               | +                                        | +                                    | +          |
| KEYNOTE-048   | +                                           | +                                       | ?                                                         | +                                               | +                                        | +                                    | +          |
| KEYNOTE-061   | +                                           | +                                       | +                                                         | +                                               | +                                        | +                                    | +          |
| KEYNOTE-062   | +                                           | +                                       | ?                                                         | +                                               | -                                        | +                                    | +          |
| KEYNOTE-119   | +                                           | +                                       | -                                                         | +                                               | +                                        | +                                    | +          |
| KEYNOTE-181   | ?                                           | ?                                       | -                                                         | +                                               | -                                        | +                                    | +          |
| KEYNOTE-189   | +                                           | +                                       | +                                                         | +                                               | +                                        | +                                    | +          |
| KEYNOTE -355  | +                                           | +                                       | +                                                         | +                                               | +                                        | +                                    | +          |
| KEYNOTE-407   | +                                           | +                                       | +                                                         | +                                               | +                                        | +                                    | +          |
| KEYNOTE-522   | +                                           | +                                       | +                                                         | +                                               | +                                        | +                                    | +          |
| KEYNOTE-604   | +                                           | +                                       | +                                                         | +                                               | +                                        | +                                    | +          |
| MYSTIC        | +                                           | ?                                       | ?                                                         | +                                               | +                                        | +                                    | +          |

**Figure S3.** Risk of bias summary: review author's judgements about each risk of bias item for each included study.

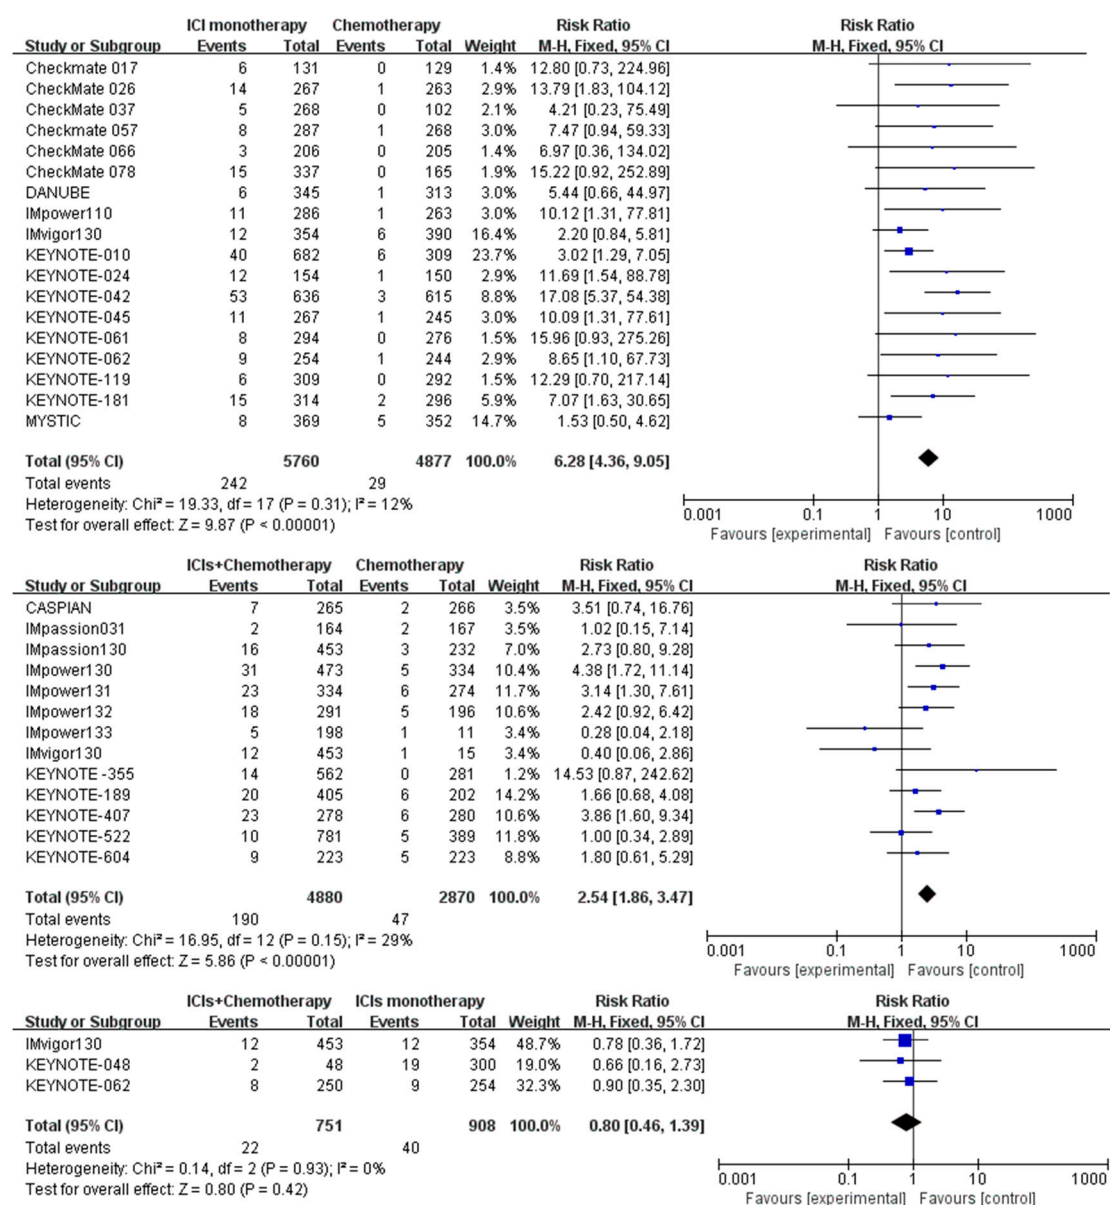

**Figure S4.** Forest plots and pairwise meta-analysis of direct comparisons for the risk of any grade IRP. ICIs, immune checkpoint inhibitors; IRP, immune-related pneumonitis.

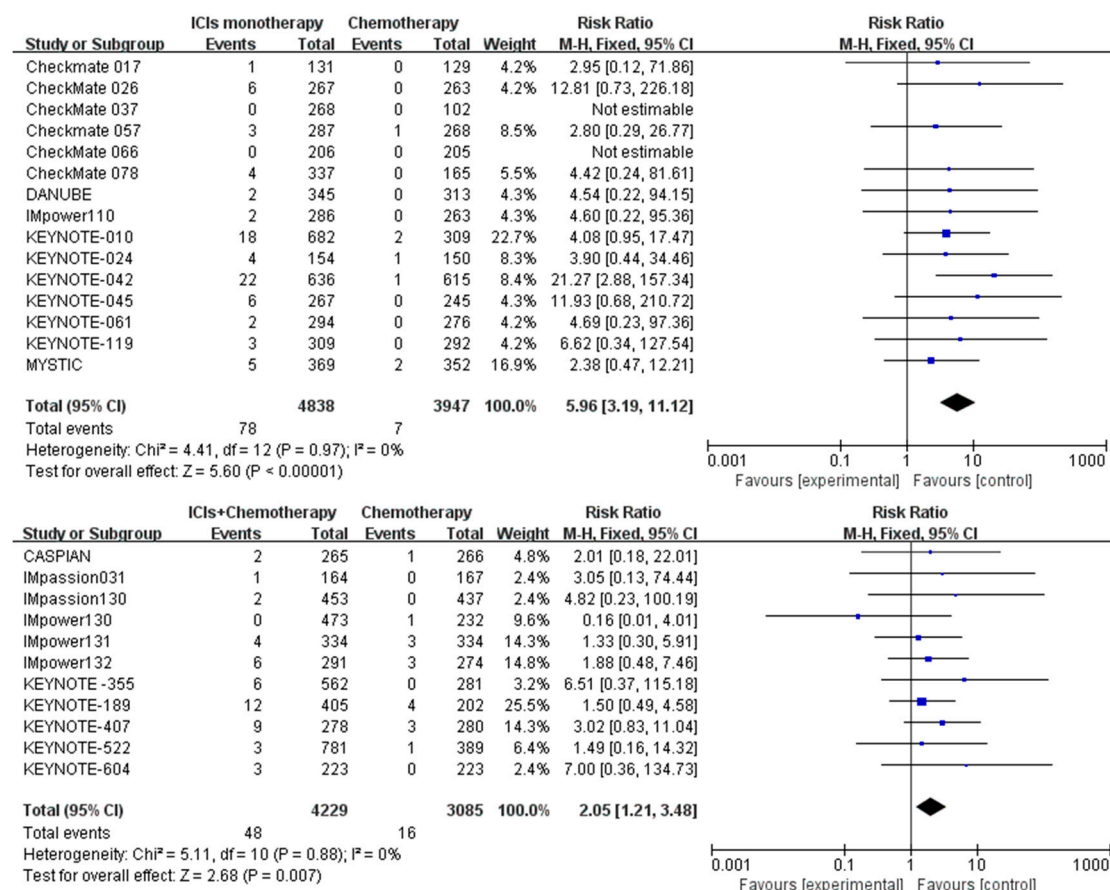

**Figure S5.** Forest plots and pairwise meta-analysis of direct comparisons for the risk of grade 3 or higher IRP. ICIs, immune checkpoint inhibitors; IRP, immune-related pneumonitis.

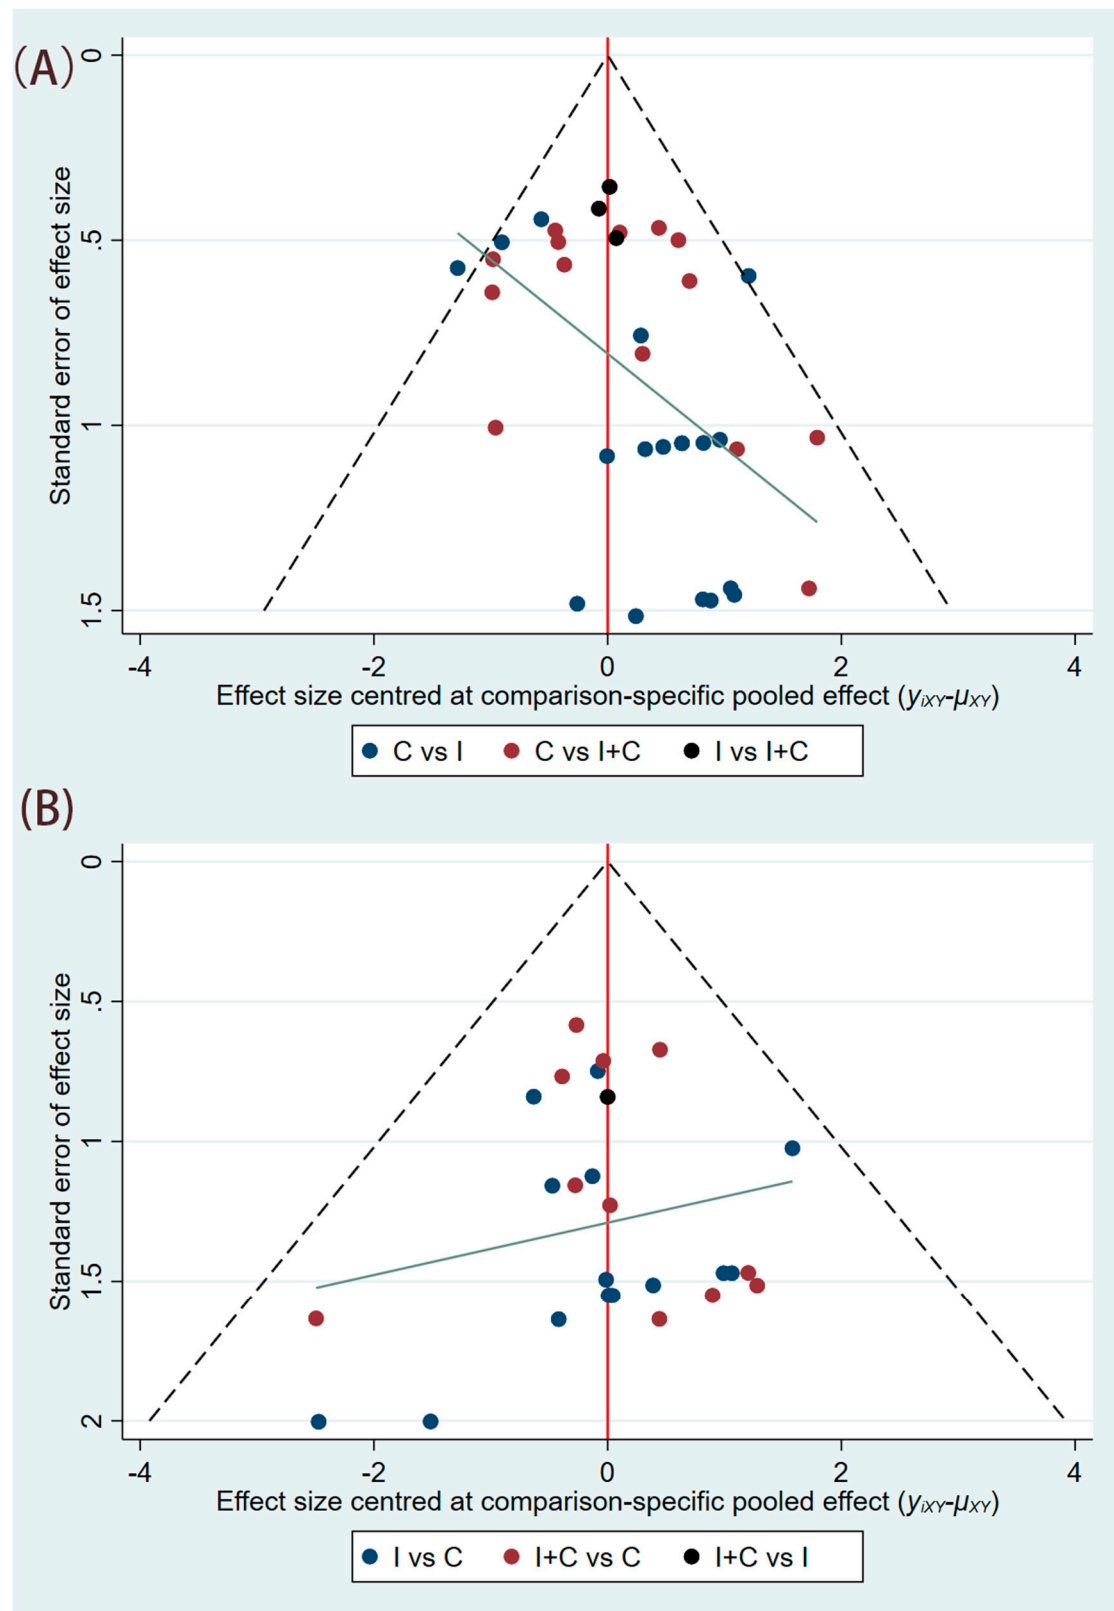

**Figure S6.** Publication bias for (A) any grade IRP and (B) grade 3-5 IRP in all population.
